# Supplementary material for: Beneficial effects of relaxin on motility characteristics of stored boar spermatozoa
Source: Springer Nature journal article supplement (doi:10.1186/s12958-015-0021-4), 2015-03-31
Supplement: MOESM1 [file 9765332]

|                                 |                                                                       |  | Length (AA) |
|---------------------------------|-----------------------------------------------------------------------|--|-------------|
| Homo sapiens (NP_067647.2):     | MTSGSVFFYILIFGKYFSHGGQDVKCSLGYFPCGNITKCLPQLLHCNGVDDC-----             |  | 60          |
| Mus musculus (NP_997617.1):     | MTSGPFFFCIFIIGKYFTLGSAQDVSCPLGSFPCGNMSRCLPQLLHCNGVDDC-----            |  | 60          |
| Bos taurus (XP_610789.3):       | MTRSRPVFLYILIFGKYFAPGRAQNAPCDLGYFPCGNITKCLPQQLQCVGDDC-----            |  | 60          |
| Canis familiaris (XP_532702.2): | MSAAPVVIAARLGATKMPLG-----GYMQAKGLDSALKGSQLL                           |  | 60          |
|                                 | *:: : : : : : * : : : * : *                                           |  |             |
| Homo sapiens (NP_067647.2):     | -----GNQADED <b>NCGDNNGWSLQFDKYFASYYKMTSQYP-FE</b> AET                |  | 120         |
| Mus musculus (NP_997617.1):     | -----GNRADEDHCGDNNGWSLQDKYFANYKLASTNS-FEAET                           |  | 120         |
| Bos taurus (XP_610789.3):       | -----ENHVEDNCGDINGWSTQFDRYYGNNYKMTSLYPSIVAET                          |  | 120         |
| Canis familiaris (XP_532702.2): | SQRRPRGPLRARHWAEGPRQGRELRARGPGDNNGWPLQFDKYVANYYRMTSSYP-FEAQT          |  | 120         |
|                                 | .. ** ** * : * : * : * : * : * : * : *                                |  |             |
| Homo sapiens (NP_067647.2):     | <b>PECLVGSVPVQCLCQGLELDCDETNLRAVPSVSSNVTAMSLQWNLIRKLPDFCKNYHDL</b>    |  | 180         |
| Mus musculus (NP_997617.1):     | SECLVGSVPMHCLCRDLELDCDEANLRAVPSVSSNVTVMSLQRNFIRTLPPNGFRKYHEL          |  | 180         |
| Bos taurus (XP_610789.3):       | SECLVGSPPMQCICQGLELECEINLRAVPSVSSNVTFMSLRNLIKLPNVFKRYHGL              |  | 180         |
| Canis familiaris (XP_532702.2): | SECLVGSVPMQCVCRGLEVDCDETNLRAVPSVSSNVTLMSLRWNLIRKLPDGFGRKYHNL          |  | 180         |
|                                 | .***** * : * : * : * : * : * : * : * : * : * : * : * : *              |  |             |
| Homo sapiens (NP_067647.2):     | <b>QKLYLQNNKITSISYAFRGLNSLTKLYLSHNRIFLKPGVFEDLHRLEWLI IEDNHL</b> SR   |  | 240         |
| Mus musculus (NP_997617.1):     | QKLCLONNRIHSVSVSAFRGLRSLTKLYLSHNRIFLKPGVFEDLHRLEWLI IEDNHLSR          |  | 240         |
| Bos taurus (XP_610789.3):       | QTLCLQNNKIRSVSVYAFRGLYSLTKLYLSHNRI TLKPGVFEDLHRLEWLI IEDNHLNR         |  | 240         |
| Canis familiaris (XP_532702.2): | QKLCLONNKIRSIPIYAFRGLHSLTKLYLSHNRI FLKPGVFEDLHRLEWLI IEDNHLSR         |  | 240         |
|                                 | * * * * * * * * * * * * * * * * * * * * * * * * * * * * * * * * * * * |  |             |
| Homo sapiens (NP_067647.2):     | <b>ISPPTY</b> GLNSLILLVMNVLTRLPDKPLCQHMPRLHWLDLEGNHIHNLNRNLTFISCSN    |  | 300         |
| Mus musculus (NP_997617.1):     | ISPLTFYGLNSLILLVMNVALTRLPDKPLCQHMPRLHWLDFEGNRIHNLNRNLTFISCSN          |  | 300         |
| Bos taurus (XP_610789.3):       | ISPLTFYGLNSLILLVMNVLTRLPDKSLCQHMPRLHWLDFEGNHIHNLNRNLTFISCSN           |  | 300         |
| Canis familiaris (XP_532702.2): | ISPLTFYGLNSLILLALMNNVLTHLPDKPLCQYMPRLHWLLEDNHIHNLNRNLTFISCSN          |  | 300         |
|                                 | *** ***** * * * * * * * * * * * * * * * * * * * * * * * * * * *       |  |             |
